# Supplementary material for: ‘Doing hymen reconstruction’: an analysis of perceptions and experiences of Flemish gynaecologists
Source: PubMed Central journal article supplement (PMC6001123; doi:10.1186/s12905-018-0587-z), 2018-06-13
Supplement: 12905_2018_587_MOESM1_ESM.pdf [file 12905_2018_587_MOESM1_ESM.pdf]

- 1) What is your age?
  - 30 - 40 years;
  - 41 - 50 years;
  - 51 - 60 years;
  - 61 - 70 years
  
- 2) What is your gender?
  - Man
  - Woman
  
- 3) You are employed in:
  - Big city (Brussels, Antwerp or Ghent);
  - Medium-sized city;
  - Rural area;
  - Other
  
- 4) You work in a:
  - Private practice;
  - General Hospital,
  - University Hospital
  
- 5) Have you already had patients requesting hymen reconstructions?
  - Yes
  - No
  
- 6) How many requests for hymen repair did you receive in the last 12 months?
  - None,
  - 1,
  - 2,
  - 3,
  - 4,
  - 5,
  - 6-10,
  - 11-20,
  - More than 20
  
- 7) Do you request the following information from the patient:
  - Religion,
  - Ethnicity,
  - Age,
  - Relationship status (cohabiting, married, single),
  - Motivation for request for hymen reconstruction,
  - General knowledge of the patient about genitals and hymen,
  - Confidential person of the patient (someone who is close to the patient e.g. family, friend who can help her after surgery or where she go for advice)
  - Other

- 8) Do you ask for the reason why the women / girls want to undergo a hymen reconstruction?
- Yes
  - No
- 9) Why do you ask (or not) for the reason why the women / girls want to undergo a hymen reconstruction?
- .....
- 10) What are the reasons that the women / girls indicate?
- Religious prescription,
  - Cultural customs,
  - Pressure from the family,
  - For fear of violence,
  - Out of respect and affection for the family,
  - Out of respect for the future husband,
  - Cosmetic reasons,
  - Other
- 11) What do you do in case of a request for hymen reconstruction?
- I do the surgery,
  - I do not perform the intervention,
  - I refer to others,
  - Other reason
- 12) Which items do you communicate with the patient?
- I counsel the patient on the following alternatives: virginity ovule (A vaginal gelatin capsule that can simulate bleeding)
  - I counsel the patient on the following alternatives: Prick in finger (The woman pricks with a needle in the finger so that she can spread a few drops of blood on the sheet.)
  - I counsel the patient about other alternatives.
  - I inform the patient about my personal concerns but make it clear that she has the right to decide.
  - I am talking about the possible psychological consequences of the hymen reconstruction. (This means that the patient can develop feelings of guilt towards the partner due to unfairness of her virginity status)
  - Other
- 13) If you refuse or refer the patient, for what reason do you do that?
- I do not have the necessary knowledge and technical skills to carry out such interventions.
  - I do not perform any surgical procedures.
  - The procedure is not medically indicated.
  - The intervention contributes to deception of the future marriage partner and the families involved.
  - Performing the intervention means maintaining the myth that every hymen will bleed at first coitus.

- The intervention contributes to the maintenance of a double standard. (That is, a virginity test for women and that it is not necessary for men.)
- The intervention violates the right to physical integrity and self-determination of women.
- Others

14) If you do the surgery, which is your motivation?

- That it is the woman who has the right to decide on her own body, independent of your personal opinion.
- That the woman is in danger, she can become a victim of honor killings.
- That it is a small, reversible, innocent intervention without risks.
- That the failure to operate maintains the double standard.
- That it is an intervention like any other, I just execute them.
- Others

15) Have you already experienced complications after carrying out such procedures?

- Yes,
- No,
- Not applicable

16) If you have already experienced complications, what are the most common complications?

- .....

17) Do you follow-up?

- Yes,
- No, go to 18
- Not applicable

18) Why do you not do follow-up?

- The patient is not open to this: she has made it clear that she would rather not take part in the follow-up.
- Follow up is not necessary for this surgery
- Other

19) Do you know the number of patients coming for a follow up consultation?

- .....

20) If you do follow-up, what does it consists of?

- .....

21) I register this procedure under:

- Vulvo-vaginal plastic surgery
- Surgery on the abdomen,
- Not applicable
- Other

22) If a patient would request a hymenreconstruction, I would:

- Perform the surgery,
- Not perform the surgery,
- Refer the patient,
- Other

23) If I were requested to do a hymen reconstruction, I would not carry out the procedure for the following reasons:

- I do not have the necessary knowledge and technical skills to carry out such interventions.
- I do not perform any surgical procedures.
- The procedure is not medically indicated.
- The intervention contributes to deception of the future marriage partner and the families involved.
- Performing the intervention means working on the myth that every hymen will bleeds at first coitus.
- The intervention contributes to the maintenance of a double standard. (That is, a virginity test for women and that it is not necessary for men.)
- The intervention violates the right to physical integrity and self-determination of women.
- Other

24) If I were requested to do a hymen reconstruction, I would perform the procedure for the following reasons:

- The woman has the right to decide on her own body, independent of my personal opinion.
- The woman is in danger, she can become a victim of honor killings.
- It is a small, reversible, innocent intervention without risks.
- The failure to operate maintains the double standard.
- It is an intervention like any other, I just execute it
- Other

25) Indicate the answer that is closest to your personal opinion:

|                                                                                  | <b>Totally disagree</b> | <b>Disagree</b> | <b>Neutral</b> | <b>Agree</b> | <b>Totally agree</b> |
|----------------------------------------------------------------------------------|-------------------------|-----------------|----------------|--------------|----------------------|
| I have the necessary knowledge and technical skills to carry out such operations |                         |                 |                |              |                      |
| The procedure is not medically indicated                                         |                         |                 |                |              |                      |
| The intervention violates the right                                              |                         |                 |                |              |                      |

|                                                                                                                              |  |  |  |  |  |
|------------------------------------------------------------------------------------------------------------------------------|--|--|--|--|--|
| to physical integrity and self-determination of the woman                                                                    |  |  |  |  |  |
| The intervention means contributing to the myth that every hymen will bleed at first coitus                                  |  |  |  |  |  |
| The intervention contributes to the deception of the future marriage partner and the families involved                       |  |  |  |  |  |
| The intervention helps to maintain a double standard. (i.e. a virginity test for women and that it is not necessary for men) |  |  |  |  |  |
| The woman has the right to decide on her own body. My personal opinion about the operation is completely separate from this  |  |  |  |  |  |
| The woman is in danger, she can become a victim of honor killings                                                            |  |  |  |  |  |
| It is a small, reversible, innocent intervention without risk                                                                |  |  |  |  |  |
| Failure to operate                                                                                                           |  |  |  |  |  |

|                                                                                                                                                    |  |  |  |  |  |
|----------------------------------------------------------------------------------------------------------------------------------------------------|--|--|--|--|--|
| maintains the double standard                                                                                                                      |  |  |  |  |  |
| This procedure is an intervention like any other, I just execute them                                                                              |  |  |  |  |  |
| I think that hymen reconstructions maintain the virginity myth. (The virginity myth is the rumor that every girl should bleed at the first coitus) |  |  |  |  |  |

- 26) I think that such interventions should be reimbursed by the health insurance
- Yes
  - No

27) If you have any comments about the previous question, you can mention them here  
 .....

- 28) Was hymen reconstruction part of your basic training?
- Yes
  - No

29) If you have any comments about the previous question, you can mention them here.  
 .....

- 30) Was hymenreconstruction part of your specialization training?
- Yes
  - No

31) If you have any comments about the previous question, you can mention them here:  
 .....

- 32) Would you rather have had more information about this procedure during your studies?
- Yes
  - No

33) If you have any comments about the previous question, you can mention it here:

.....

34) Do you find it useful to include this subject in the curriculum?

- Yes
- No

35) If you have any comments about the previous question, you can mention them here:

.....

36) Are you familiar with any guidelines from Belgian or international organizations regarding hymen reconstructions?

- Yes
- No

37) If yes, which guideline was this?

.....

38) I think that the VVOG (Flemish Association of Gyn/obs) should draw up a guideline on hymenreconstructions.

- Yes
- No

39) If you have any comments about the previous question, you can mention them here:

.....

40) If you would like to share any other comment, you can mention it here:

.....;
